# Supplementary material
Source: PubMed Central journal article supplement (PMC7952011)

Figure 1  
Olgun et al.

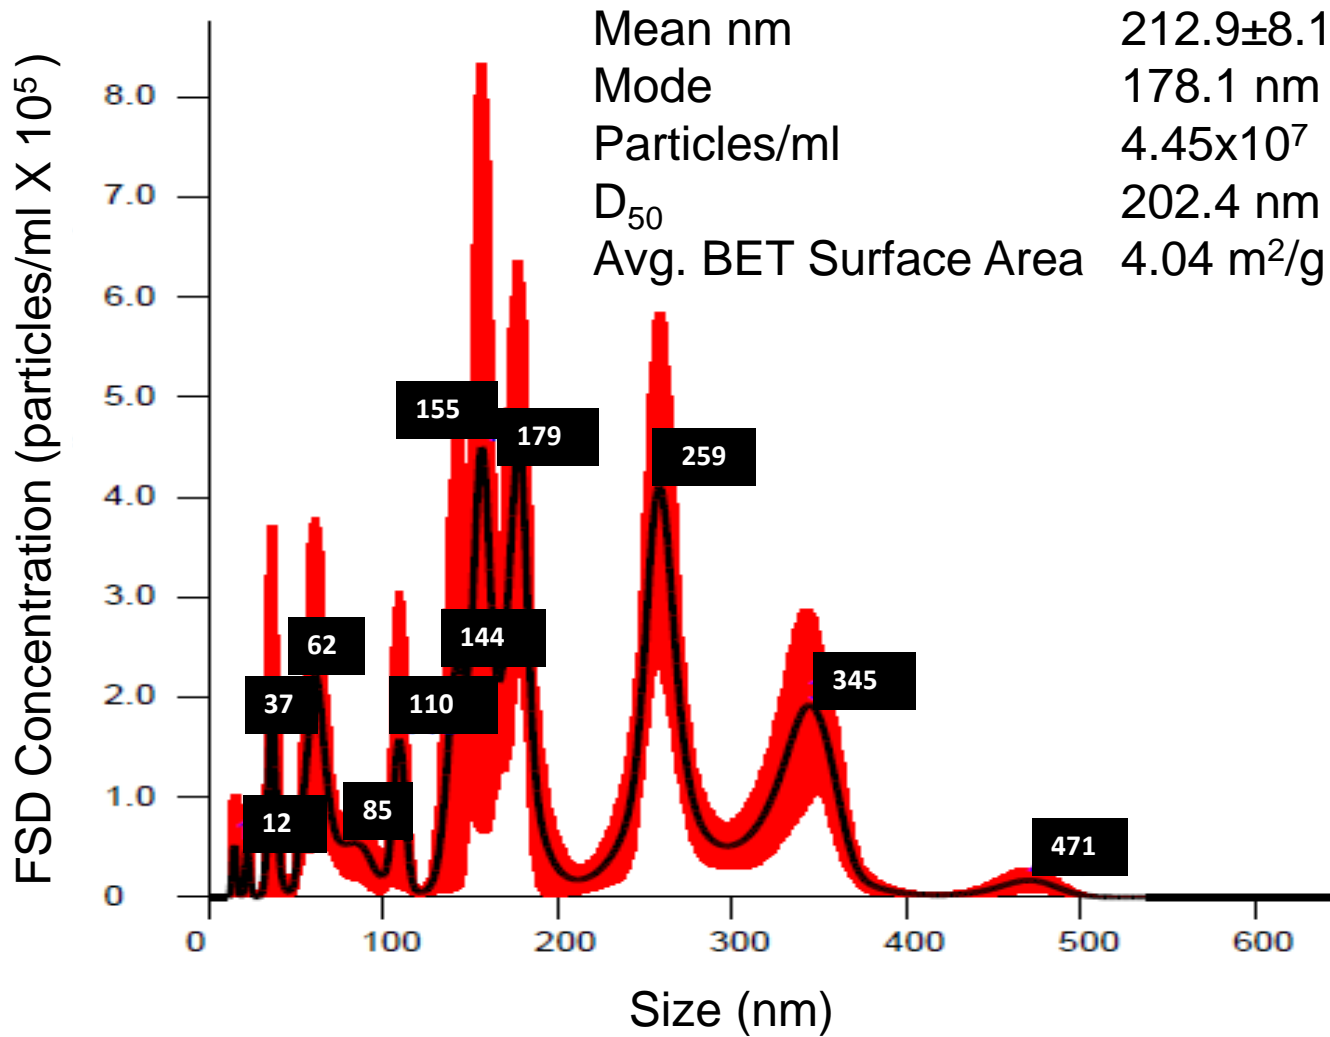

Figure 2  
Olgun et al.

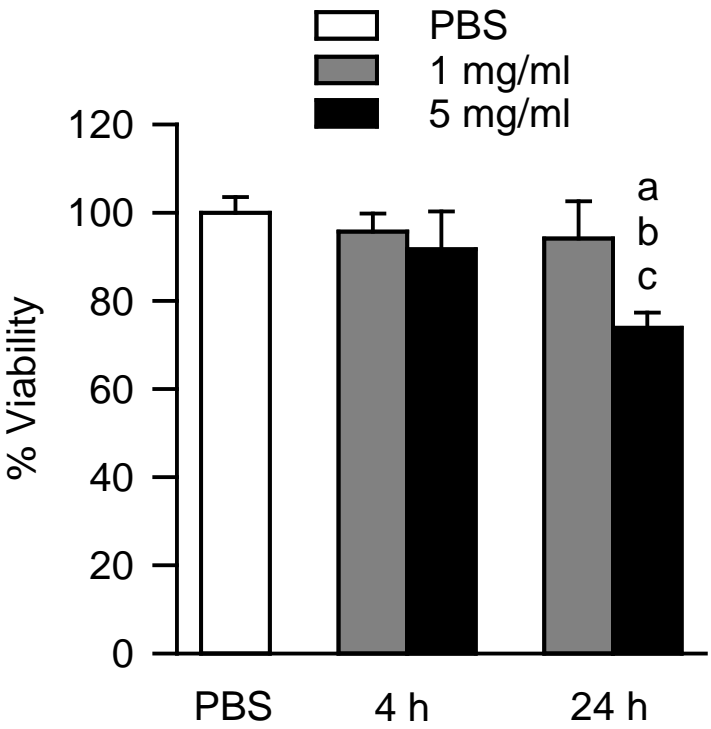

Figure 3  
Olgun et al.

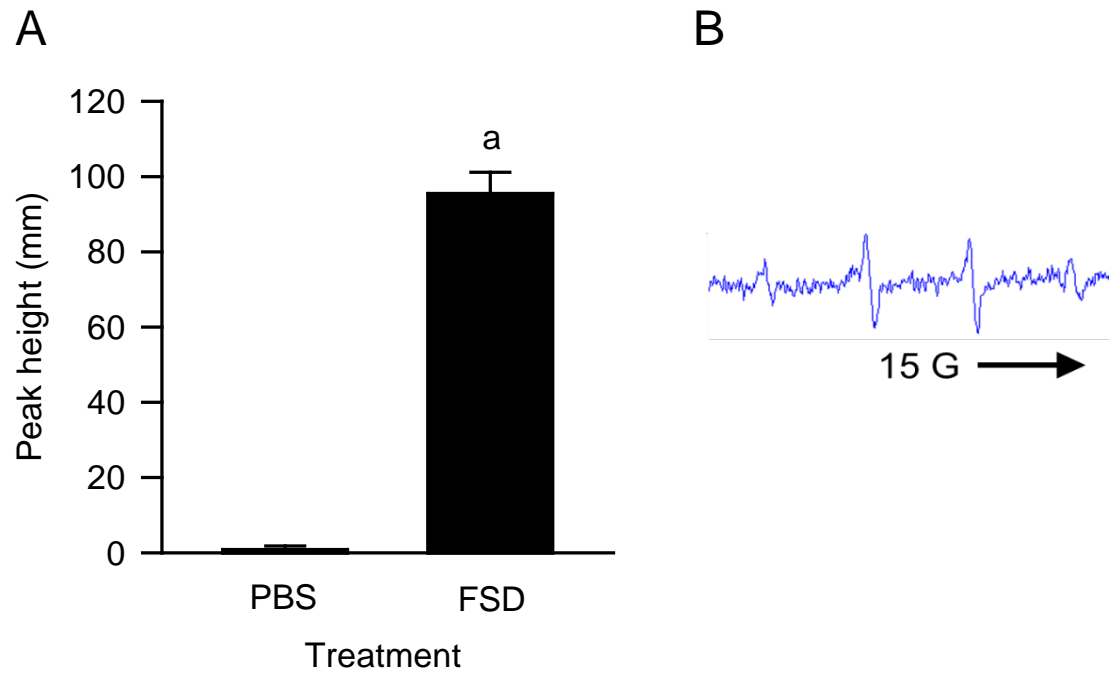

Figure 4  
Olgun et al.

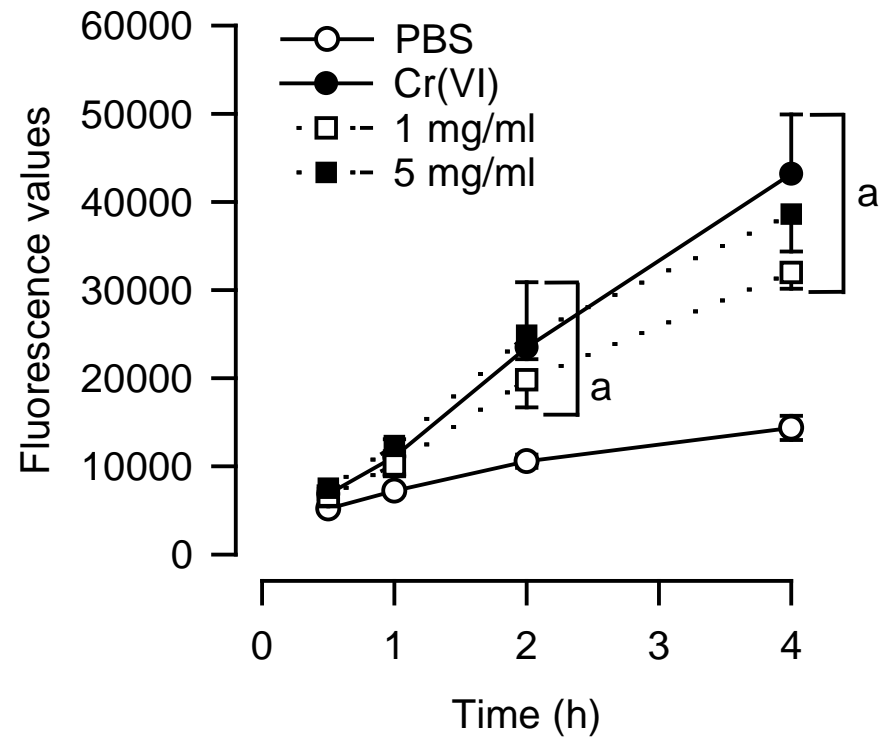

Figure 5  
Olgun et al.

A

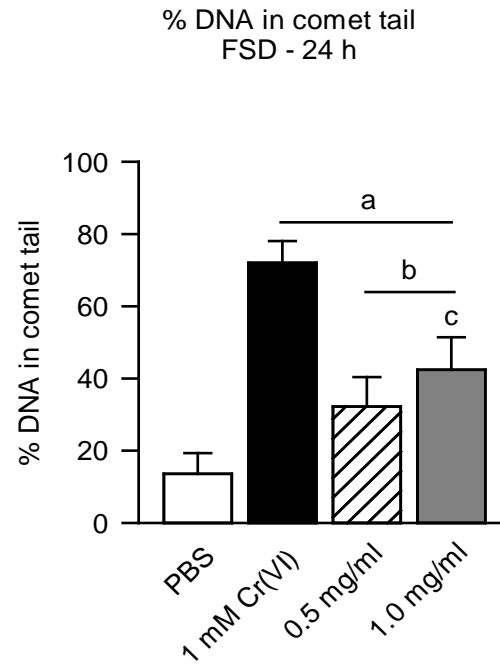

B

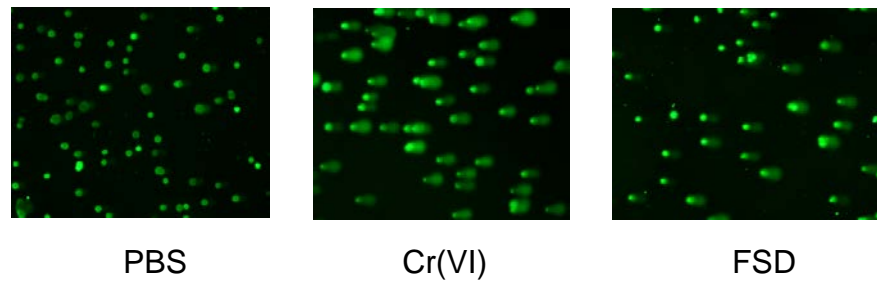

Figure 6  
Olgun et al.

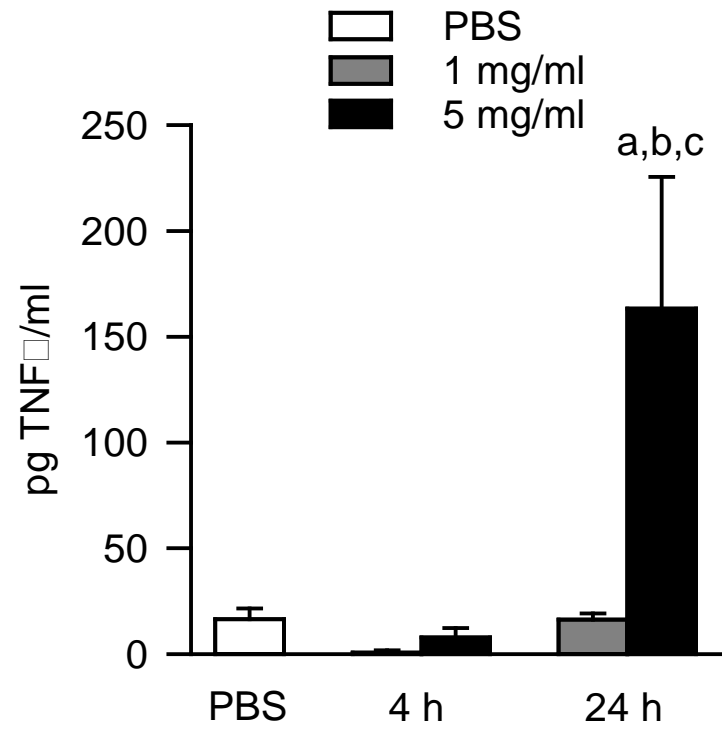

Figure 7  
Olgun et al.

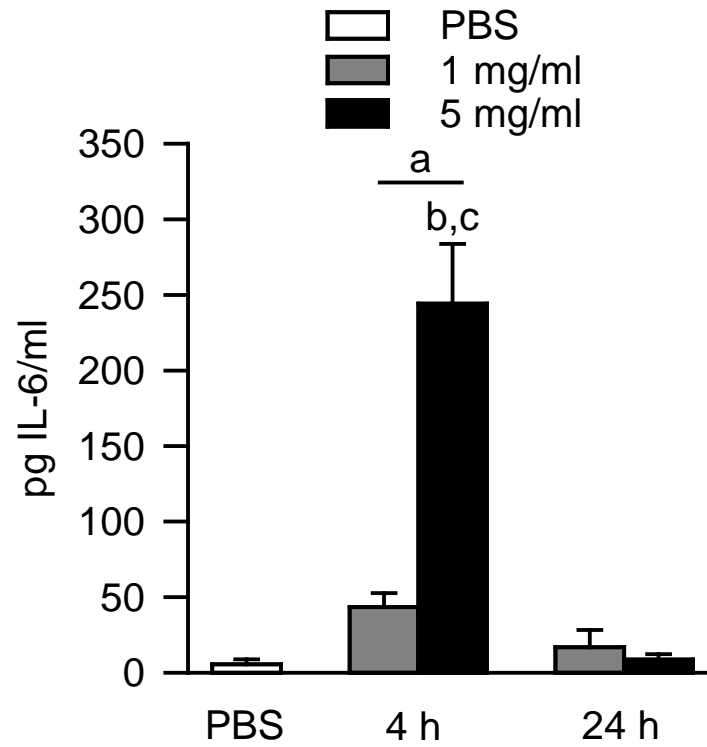

Figure 8  
Olgun et al.

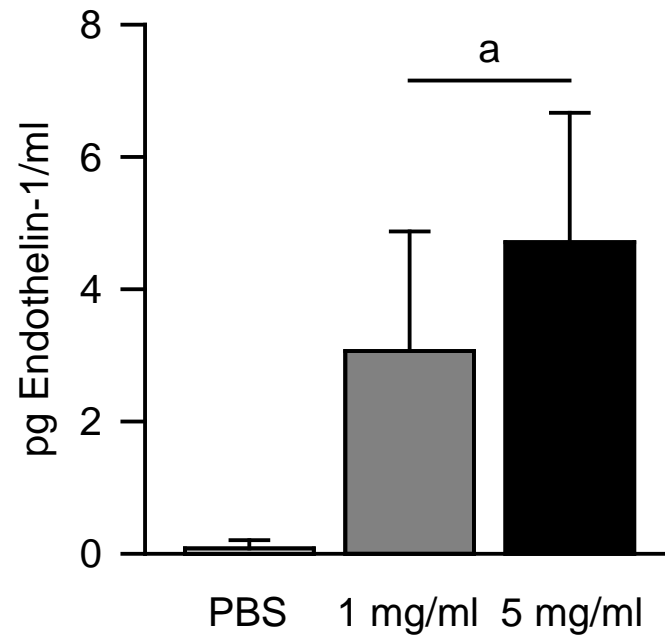



Figure 9  
Olgun et al.

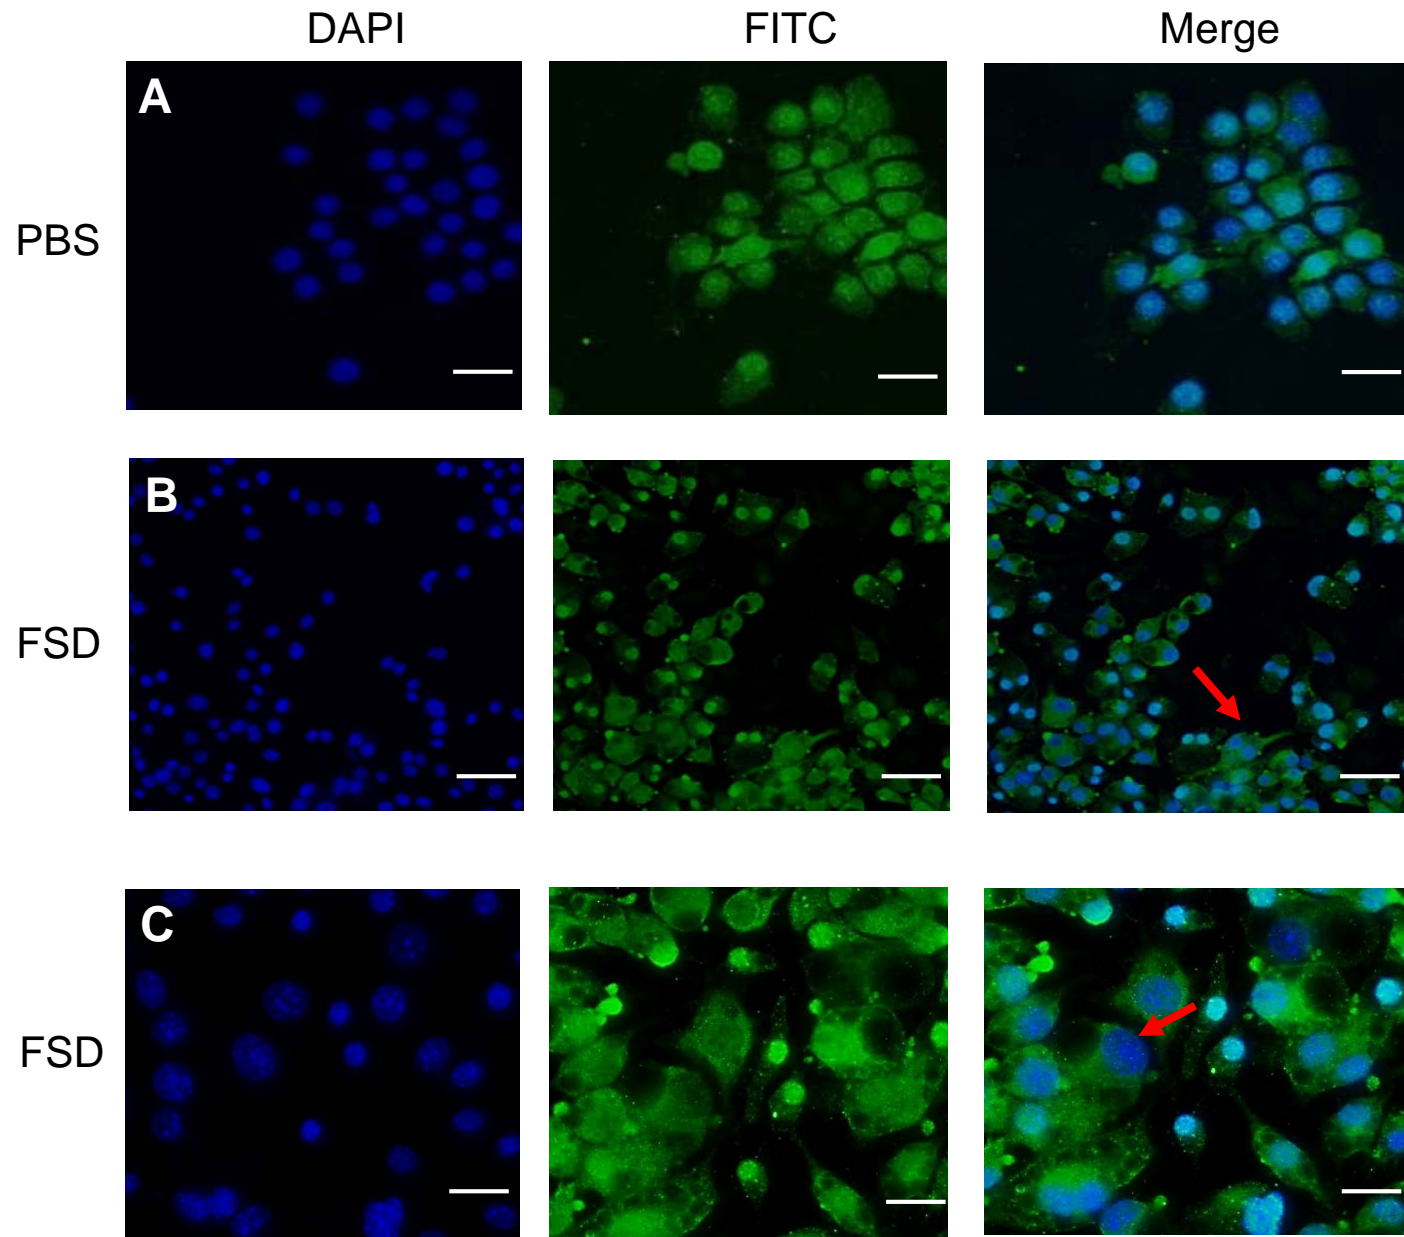

Figure 10  
Olgun et al.

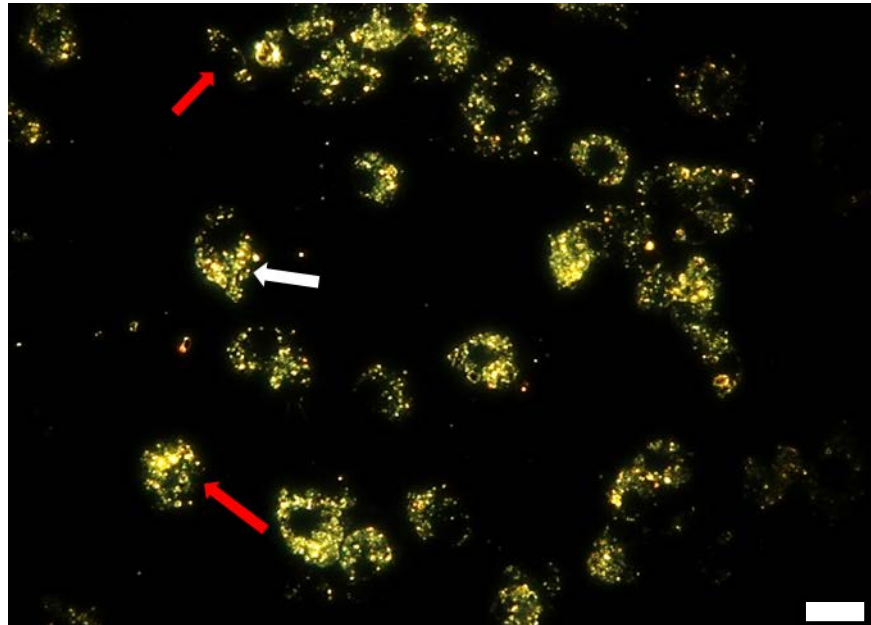

Supplement: NIHMS1673308-supplement-combined_figures.pdf [file NIHMS1673308-supplement-combined_figures.pdf]
